# Supplementary material for: Benchmarking ozone stress parameterizations in CLM5: a global mechanistic assessment of thresholds and memory effects
Source: Copernicus journal article supplement (doi:10.5194/egusphere-2026-350), 2026-02-24
Supplement: Supplementary file [file egusphere-2026-350-AC1-supplement.pdf]

Reviewer: 1

Comments to the Author:

This manuscript compares global-scale simulation results of different ozone stress parameterization schemes in CLM5. The research topic is of strong scientific significance and value for model development. Using consistent meteorological and ozone forcing data, the study conducts a mechanism-consistent evaluation of three representative schemes—Sitch, Lombardozzi, and Li—and performs multi-scale validation against GPP data from MODIS and FLUXNET. Overall, the research framework is relatively comprehensive, and the results are reasonably convincing. In particular, the analysis of how ozone flux thresholds, response function forms, and memory effects influence simulation outcomes has practical significance for improving ozone stress processes in land surface models. However, the manuscript still has room for improvement in terms of the following aspects. The authors are therefore encouraged to revise the manuscript further to enhance its completeness and persuasiveness.

**Response:** Thank you very much for your positive evaluation of our manuscript and constructive suggestions. We greatly appreciate your recognition of the scientific significance of this work, particularly regarding the comparison of ozone stress parameterization schemes and their implications for land-surface model development. Following your comments, we have carefully revised the manuscript to further improve the clarity, completeness, and robustness of the study. Specifically, we expanded the Introduction to better clarify the scientific rationale and significance of ozone-stress parameterization schemes, improved the interpretation of the no-ozone baseline experiment, and added further discussion regarding the influence of model structural differences (e.g., CLM4.5 versus CLM5) on ozone-stress evaluation. We also refined the descriptions of the results, discussion, and conclusions to improve logical consistency and scientific interpretation across multiple spatial and temporal scales. All detailed revisions corresponding to your comments are provided in the point-by-point responses. In the revised manuscript, modifications made in response to your comments are highlighted in **blue**, while revisions associated with another reviewer are highlighted in **red** for clarity. We sincerely appreciate your valuable comments and guidance, which have substantially improved the quality, rigor, and readability of the manuscript.

Specific comments:

1. It is recommended to further clarify the significance and scientific basis of adopting ozone stress parameterization schemes.

**Response:** Thank you very much for this important suggestion. Following your comment, we further clarified the significance and scientific basis of adopting ozone-stress parameterization schemes in the Introduction. Specifically, we added an explanation emphasizing that ozone damage is fundamentally controlled not only by ambient ozone concentration, but also by stomatal uptake, plant detoxification/tolerance capacity, and the subsequent physiological regulation of photosynthesis and stomatal conductance. We also clarified why process-based ozone-stress parameterizations are necessary to link atmospheric ozone forcing terrestrial carbon-cycle responses in land surface models.

The following text has been added to the Introduction:

In land surface models, the scientific rationale for adopting ozone-stress parameterizations is that ozone injury is not directly determined by ambient concentration alone, but by the amount of ozone entering leaves through stomata, the capacity of plants to detoxify or tolerate that flux, and the subsequent physiological downregulation of photosynthesis and stomatal conductance (Sitch et al., 2007). Without such process-based parameterizations, models either neglect an important atmospheric stressor or treat ozone exposure in a way that is disconnected from canopy physiology, water limitation, phenology, and differences in plant functional type (Fuhrer, 1996). Therefore, ozone-stress parameterizations provide the necessary mechanistic bridge between atmospheric ozone forcing and terrestrial carbon-cycle responses, allowing land surface models to diagnose when ozone damage is triggered, how it accumulates over time, and how strongly it suppresses GPP across different ecosystems.

2. The current analysis mainly focuses on differences among the various ozone stress parameterization schemes. However, the results suggest that simulations without ozone stress sometimes exhibit higher accuracy. Therefore, it is recommended to include a comparative analysis between results “with ozone stress” and “without ozone stress.”

**Response:** Thank you very much for this insightful suggestion. Following your recommendation, we substantially expanded the comparison and discussion between simulations “with ozone stress” and “without ozone stress” throughout the manuscript. In the revised Results section, we added a series of explicit comparisons between the no-ozone experiment and the ozone-stress parameterization schemes across multiple spatial, temporal, and biome scales. Specifically, we clarified that the no-ozone case substantially overestimates tropical GPP relative to MODIS and FLUXNET, particularly in humid low-latitude ecosystems and central African regions, underscoring the importance of accounting for ozone stress to reduce excessive tropical productivity. At the same time, we also emphasized that the no-ozone case sometimes exhibits lower RMSE, higher NSE, or stronger preserved seasonal variability than the ozone-stress parameterization schemes in some temperate, boreal, and forest-dominated regions, suggesting that introducing ozone stress alone cannot fully resolve all discrepancies relative to observations and that other physiological or environmental constraints may still contribute to model uncertainty.

To further interpret these findings, we added a new discussion in Section 4 comparing our CLM5-based results with earlier CLM4.5-based studies. We clarified that the baseline no-ozone global GPP in CLM5 ( $\sim 132 \text{ Pg C yr}^{-1}$ ) is already substantially lower than that reported in earlier CLM4.5 studies ( $\sim 146.5 \text{ Pg C yr}^{-1}$ ), indicating that improvements in land-surface physiology and canopy-process representation have already reduced part of the intrinsic productivity bias. Consequently, the remaining correction space for ozone stress in CLM5 is smaller, and excessive ozone suppression can more easily lead to underestimation in some regions and statistical metrics. We therefore emphasized that the apparent benefit of ozone-stress parameterizations strongly depends on the baseline behavior of the host land-surface model.

In addition, we incorporated this interpretation into the Conclusion section, where we further highlighted that ozone stress effectively suppresses the tropical overestimation in the no-ozone experiment, but that improvements in model performance remain spatially and temporally heterogeneous across different metrics and ecosystems. We also stressed that future ozone parameterizations should aim not only to represent ozone damage itself, but also to achieve balanced interactions with canopy processes, phenology, hydrological constraints, and biome-dependent productivity dynamics.

The following text has been added to the Results:

Compared with the MODIS observations (Fig. 1f), the no-ozone case (Fig. 1a) shows pronounced overestimation of GPP in tropical regions, particularly in humid low-latitude ecosystems, indicating that neglecting ozone stress can substantially exaggerate tropical productivity. Compared with FLUXNET, the no-ozone case (Fig. 2a) exhibits relatively large RMSE values in central African regions, reflecting pronounced overestimation errors under humid tropical conditions. However, at some stations in the middle and high latitudes, the no ozone case still shows lower RMSE values than the ozone-stress parameterization schemes. The no-ozone case generally exhibits smaller biases than the ozone-stress parameterization schemes in several temperate and boreal biomes, suggesting that introducing ozone stress alone does not necessarily improve model performance and that additional physiological or environmental constraints may still be required to better reproduce observations.

The no-ozone case generally produces larger seasonal amplitudes than the ozone-stress parameterization schemes and, in several latitude bands, remains closer to FLUXNET during peak growing seasons, suggesting that introducing ozone stress alone cannot fully resolve the discrepancies between simulations and observations. In these forest PFTs, the no-ozone case generally produces larger seasonal amplitudes and remains closer to FLUXNET during peak growing periods than most ozone-stress parameterization schemes do. Compared with ozone-stress parameterization schemes, the no-ozone case generally exhibits higher normalized standard deviations across several PFTs, indicating stronger preservation of seasonal variability, although its correlations are not consistently the highest, and its performance for shrubs and crops is poorer than that of some ozone-stress parameterization schemes.

Among the model experiments, the no-ozone case generally maintains the highest NSE values in spring, summer, and autumn, indicating that the baseline simulation without ozone stress still reproduces seasonal variability better than most ozone-stress parameterization schemes at large scales. The no-ozone case consistently shows lower RMSE values than all ozone-stress parameterization schemes at the annual, seasonal, and monthly scales, suggesting that additional sources of model uncertainty beyond ozone stress may still contribute to discrepancies relative to FLUXNET. The no-ozone case reaches  $132.00 \text{ Pg C yr}^{-1}$ , substantially exceeding both MODIS and FLUXCOM estimates, indicating that neglecting ozone stress likely leads to an overestimation of

global terrestrial productivity.

The following text has been added to the Discussion:

Compared with the earlier CLM4.5-based study by Lombardozzi et al. (2015), an important difference emerges in the baseline productivity simulated in the absence of ozone stress. In CLM4.5, the no-ozone global GPP reached approximately 146.5 Pg C yr<sup>-1</sup>, whereas the corresponding no-ozone simulation in the present CLM5 framework is substantially lower (132 Pg C yr<sup>-1</sup>). This indicates that improvements in the underlying land-surface physiology and canopy process representation from CLM4.5 to CLM5 have already reduced part of the excessive global productivity bias. Consequently, the introduction of ozone stress in CLM4.5 moved the simulated GPP closer to observational benchmarks at the global scale, whereas in CLM5, the remaining correction space is smaller, and excessive ozone suppression can more easily lead to underestimation in some regions and statistical metrics. This difference highlights that the apparent performance of ozone-stress parameterizations is strongly dependent on the baseline behavior of the host land-surface model.

The following text has been added to the Conclusion:

Our results further suggest that the apparent benefit of introducing ozone stress depends strongly on the baseline behavior of the host land-surface model. Compared with earlier CLM4.5-based studies, the no-ozone simulation in CLM5 already produces substantially lower global GPP, indicating that improvements in canopy physiology and land-surface process representation have reduced part of the intrinsic productivity bias. Consequently, although ozone stress effectively suppresses the tropical overestimation present in the no-ozone experiment, improvements in model performance remain spatially and temporally heterogeneous across different evaluation metrics and ecosystems. This highlights that future ozone parameterizations should not only focus on representing ozone damage itself, but also on achieving balanced interactions with the underlying model structure, including canopy processes, phenology, hydrological constraints, and biome-dependent productivity dynamics.

The zonal mean results are currently presented primarily as line plots (Figure 3), with no quantitative comparisons among the schemes. It is suggested to add bar charts with quantitative metrics to more clearly illustrate and quantify performance differences across schemes.

**Response:** Thank you very much for this helpful suggestion. Following your recommendation, we added additional quantitative comparisons to complement the zonal-mean line plots. Instead of introducing additional bar charts, we summarized the overall performance differences among the schemes using a new quantitative table (Table 3), which reports the annual mean GPP bias relative to FLUXNET for each parameterization scheme and MODIS. We believe that this tabular format provides a more concise and direct comparison of the integrated biases across schemes while

avoiding redundancy with the existing zonal plots.

Specifically, we added the following text to the Results section:

The bias statistics further support these zonal characteristics (Table 3). The no-ozone case shows an overall annual mean bias of  $284 \text{ gC m}^{-2} \text{ yr}^{-1}$  relative to FLUXNET. Among the ozone-stress simulations, the Li parameterization scheme produces the smallest annual mean bias ( $420 \text{ gC m}^{-2} \text{ yr}^{-1}$ ), followed by the Li framework combined with Lombardozzi and Sitch thresholds and functions, with biases of 425 and  $428 \text{ gC m}^{-2} \text{ yr}^{-1}$ , respectively, whereas the Lombardozzi parameterization scheme exhibits the largest bias ( $566 \text{ gC m}^{-2} \text{ yr}^{-1}$ ). In contrast, MODIS shows the smallest annual mean bias ( $229 \text{ gC m}^{-2} \text{ yr}^{-1}$ ) relative to FLUXNET.

In addition, we introduced the following new table:

Table 3. Annual mean GPP bias relative to FLUXNET across different ozone parameterization schemes.

| Experiment name                             | I2000 (no ozone stress) | Li  | Li with Lombardozzi thresholds and function | Li with Sitch thresholds and function | Lombardozzi | MODIS |
|---------------------------------------------|-------------------------|-----|---------------------------------------------|---------------------------------------|-------------|-------|
| Bias ( $\text{gC m}^{-2} \text{ yr}^{-1}$ ) | 284                     | 420 | 425                                         | 428                                   | 566         | 229   |

3. It is recommended to further incorporate differences among biomes and potential directions for improvement into the discussion to enhance its depth.

**Response:** Thank you very much for this valuable suggestion. Following your recommendation, we further expanded the discussion of biome-dependent differences and incorporated more detailed implications for future model improvement in Section 5 (“Implications for future improvement in earth system models”).

The following text was added to the Implications for future improvement in Earth system models Section:

The significant differences in GPP bias across biomes reveal key directions for improving ozone-stress parameterization in models. In biomes with intense radiation, such as wetland grasslands and tropical moist broadleaf forests, models generally underestimate GPP, especially with the Lombardozzi scheme. Therefore, regional calibration of ozone flux thresholds and response functions is needed for these areas. In contrast, in low-stress regions such as tundra, temperate grasslands, and forests, the Li scheme, with optimized thresholds and decoupled response functions, performs best, suggesting that more refined model adjustments are required in these regions. For dry and desert biomes, a slight overestimation is observed, especially in the no-ozone simulations, indicating that the model's performance is generally good for these regions but still leaves room for further improvements when accounting for other environmental factors. In conclusion, optimizing the model to suit the characteristics of different biomes

will improve the accuracy of ozone stress simulations, thereby enhancing the reliability of climate predictions.

4. In addition, the Li scheme does not consistently perform best for crop types and under autumn conditions. This should also be reflected in the results and discussion to ensure that the conclusions are more comprehensive and objective.

**Response:** Thank you very much for this important suggestion. Following your recommendation, we revised the manuscript to provide a more balanced and objective evaluation of the Li scheme across different vegetation types and seasons. In the revised discussion and implications section, we explicitly clarified that, although the Li scheme generally performs best across most vegetation types and evaluation metrics, it does not consistently outperform the other schemes for crop types and under autumn conditions. We also emphasized that the NSE values of all ozone-stress parameterization schemes remain relatively low in summer and that the fit to FLUXNET can deteriorate after ozone stress is introduced.

To reflect these limitations more clearly, we added the following text to Section 5 (“Implications for future improvement in earth system models”):

In addition, although the Li scheme performs well across most vegetation types, especially shrubs, where it significantly reduces bias (as shown in Fig. 7), it does not always perform best in crop types and under autumn conditions. Particularly in summer, the NSE values for all ozone stress schemes are relatively low, and after ozone stress is introduced, the model's fit to FLUXNET deteriorates. This indicates that, although the Li scheme performs well in certain biomes and seasons, further optimization is still needed for crop types and seasonal variations.
